# Supplementary material for: A Novel Druggable Dual-Specificity tYrosine-Regulated Kinase3/Calmodulin Kinase-like Vesicle-Associated Signaling Module with Therapeutic Implications in Neuroblastoma
Source: MDPI journal article supplement (doi:10.3390/biomedicines12010197), 2024-01-16
Supplement: s1 [file s1]

| shRNA     | TRCN code      | sequence               |
|-----------|----------------|------------------------|
| shDYRK3-1 | TRCN0000000646 | ATGATCTTACAAACCTGCAAA  |
| shDYRK3-2 | TRCN0000000647 | GCCAGGGTCTATGATCACAAA  |
| shDYRK3-3 | TRCN0000000649 | GTAGGTCCAAATGCCAAGAAA  |
|           |                |                        |
| shCAMKV-1 | TRCN0000010254 | GCGGAAAGCTGCCAAGAACGA  |
| shCAMKV-2 | TRCN0000010255 | CGGCTGAAGAACTCGAAGATT  |
| shCAMKV-3 | TRCN0000010256 | TTGGGATGATATTTTCGCAGGC |
| shCAMKV-4 | TRCN0000010257 | GAGCAAGACCAGCGGATCACT  |

| Primer name   | Notes                | sequence                    |
|---------------|----------------------|-----------------------------|
| DYRK3 F       | Wippich et al., 2013 | TCC TTC TGA ACC ACC TCC AC  |
| DYRK3 R       |                      | CCT TCA TCT CAC CTC CAT CC  |
|               |                      |                             |
| CAMKv Nterm F |                      | TCA CTT CCT CCC TGT GAC CA  |
| CAMKv Nterm R |                      | TTC TTG TCG CCC AGA GTC AC  |
|               |                      |                             |
| CAMKv Cterm F |                      | TGG GAT GAT ATT TCG CAG GCA |
| CAMKv Cterm R |                      | CTC TTC TGC AGT GAT CCG CT  |
|               |                      |                             |
| GAPDH F       |                      | GTT CGA CAG TCA GCC GCA TC  |
| GAPDH R       |                      | TCC GTT GAC TCC GAC CTT CA  |
|               |                      |                             |
| TBP F         |                      | GCA AGG GTT TCT GGT TTG CC  |
| TBP R         |                      | CAA GCC CTG AGC GTA AGG TG  |
